# Supplementary material
Source: publisher figshare collection journal article supplement (https://karger.figshare.com/ndownloader/files/15603746)
Supplement: Supplementary file 1 [file 15603746]

*Figure Legends*

**Figure 1.** Post-operative axial (left) and coronal (right) T1weighted MRI, demonstrating placement of DBS electrodes. The tips of the electrodes are located in the globus pallidus bordering the putamen bilaterally.

**Figure 2.** Three dimensional reconstructed positions of leads with volume of tissue activation in red for the active contacts: *Right* Case (+), Contact 1(−) and *Left* Case (+), Contact 10 (−). Globus pallidus interna and externa are highlighted in green and blue, respectively. Image was generated with *Lead DBS* v2.1.81 (lead-dbs.org), and visualized with brain shift correction in DISTAL atlas 10 .

*Video Legends*

**Video 1**

Patient AS is hitting a golf ball at a driving range.

**Video 2**

Patient AS is skating and playing hockey on a frozen pond.
